# Supplementary material for: HMGB1-Induced Cross Talk between PTEN and miRs 221/222 in Thyroid Cancer
Source: Hindawi journal article supplement (doi:10.1155/2015/512027), 2015-01-01
Supplement: f1 [file 512027.f1.pdf]

### CAL62

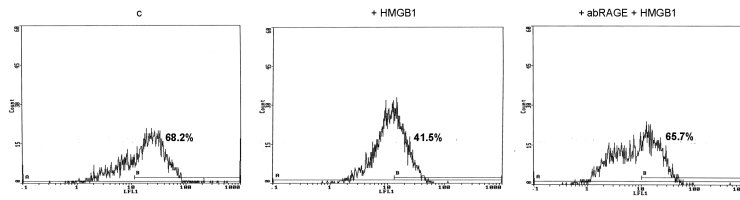

### BCPAP

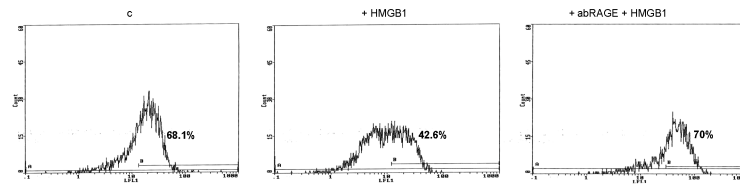

Fig.1 supplementary: Effect of RAGE blockage on PTEN expression in CAL62 and BCPAP cells

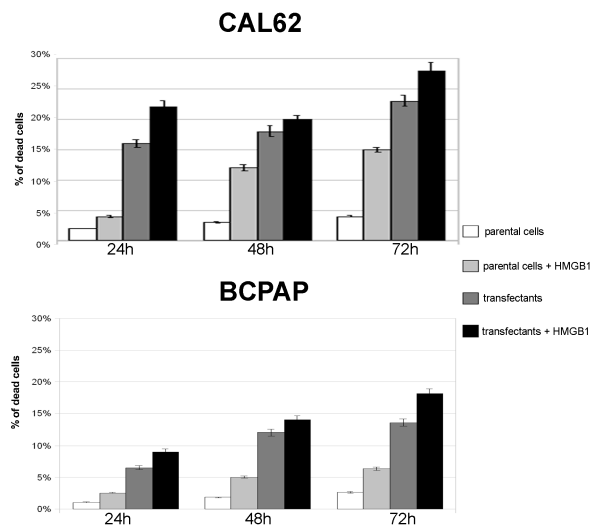

Fig 2 supplementary: Cell viability in CAL 62 and BCPAP cells treated or not with HMGB1
